# Supplementary material for: The Impact of Vegan Diet in the Prevention and Treatment of Type 2 Diabetes: A Systematic Review
Source: MDPI journal article supplement (doi:10.3390/nu13062123), 2021-06-21
Supplement: s1 [file s1]

**Supplementary Table S1.** Changes in Fasting Plasma Glucose levels (mg/dL) by group assignment.

| Reference                                                             | Intervention Group |                |               | Control Group  |              |              | Between-Group Difference<br>(Intervention-Control)<br>Mean (95% CI) | <i>p</i> -Value |
|-----------------------------------------------------------------------|--------------------|----------------|---------------|----------------|--------------|--------------|---------------------------------------------------------------------|-----------------|
|                                                                       | Baseline           | Final          | Change        | Baseline       | Final        | Change       |                                                                     |                 |
| Nicholson (1999) [1]                                                  | 193.32 (51.3)      | 139.50 (37.26) | -53.82        | 177.48 (29.34) | 155.52 (3.6) | -21.96       | -31.86*                                                             | <0.05           |
| Barnard (2009) [2]                                                    | 163.5 (7.6)        | 144.0 (7.7)    | -19.5 (7.1)** | 160.4 (5.8)    | 146.4 (8.03) | -14.0 (8.2)  | -5.5 (-27.1 to 16.0)                                                | 0.61            |
| Bunner (2015) [3]                                                     | 160.6 (73.5)       | 134.6 (51.6)   | -25.9 (65.0)  | 157.4 (60.5)   | 138.2 (51.3) | -19.2 (55.6) | -6.8 (-49.0 to 35.5)                                                | 0.75            |
| Lee (2016) [4]                                                        | 138.4 (52.4)       | 125.2 (38.0)   | -13.2 (47.4)  | 126.3 (37.7)   | 126.3 (33.0) | 0.0 (39.1)   | -13.2                                                               | 0.146           |
| Barnard (2018) [5]<br>median                                          | 125.0              | 109.0          | -16.0         | 126.0          | 101.0        | -12.5        | 7.5 (-14 to 44)                                                     | 0.71            |
| Wheeler (2002) [6]<br>10.5 h AUC (area<br>under the curve)<br>(mg%-h) | 2442 (229)         | 2 075 (135)    | -367          | 2179 (156)     | 2061 (166)   | -118         | -249                                                                | 0.12            |

Data are presented as mean (SD, if available) unless otherwise indicated, \**p* < 0.05, \*\**p* < 0.01, CI = Confidence Interval.

**Supplementary Table S2.** Changes in BMI (kg/m<sup>2</sup>) by group assignment.

| Reference          | Intervention Group |            |              | Control Group |            |              | Between-Group Difference<br>(Intervention-Control)<br>Mean (95% CI) | <i>p</i> -Value |
|--------------------|--------------------|------------|--------------|---------------|------------|--------------|---------------------------------------------------------------------|-----------------|
|                    | Baseline           | Final      | Change       | Baseline      | Final      | Change       |                                                                     |                 |
| Barnard (2009) [2] | 33.9 (1.1)         | 32.3 (1.2) | -1.6 (0.3)** | 35.9 (1.0)    | 34.8 (1.1) | -1.1 (0.3)** | -0.5 (-1.4 to 0.4)                                                  | 0.25            |
| Mishra (2013) [7]  | 33.5 (0.6)         | 32.0 (0.6) | -1.5 (0.2)** | 34.0 (0.6)    | 34.0 (0.6) | 0.0 (0.1)    | -1.6 (-1.1 to -1.9)**                                               | <0.001          |
| Bunner (2015) [3]  | 35.9 (6.0)         | 33.5 (5.7) | -2.4 (1.5)** | 36.2 (7.1)    | 36.0 (7.1) | -0.2 (1.2)   | -2.2 (-3.2 to -1.2)**                                               | <0.001          |
| Lee (2016) [4]     | 23.9 (3.4)         | 23.5 (3.4) | -0.4 (0.9)** | 23.1 (2.4)    | 23.0 (2.4) | -0.1 (0.6)   | -0.3                                                                | 0.092           |
| Barnard (2018) [5] | 34.9 (1.5)         | 32.6 (1.3) | -2.3 (0.4)** | 33.0 (1.3)    | 31.5 (1.2) | -1.5 (0.2)** | -0.8 (-1.7 to 0.1)                                                  | 0.075           |

Data are presented as mean (SD, if available) unless otherwise indicated, \**p* < 0.05, \*\**p* < 0.01, CI = Confidence Interval.

**Supplementary Table S3.** Changes in Waist Circumference (cm) by group assignment.

| Reference             | Intervention Group |             |              | Control Group |             |             | Between-Group Difference<br>(Intervention-Control)<br>Mean (95% CI) | <i>p</i> -Value |
|-----------------------|--------------------|-------------|--------------|---------------|-------------|-------------|---------------------------------------------------------------------|-----------------|
|                       | Baseline           | Final       | Change       | Baseline      | Final       | Change      |                                                                     |                 |
| Barnard (2009) [2]    | 110.8 (2.6)        | 106.6 (2.8) | -4.2 (1.0)** | 112.3 (2.1)   | 110.5 (2.1) | -1.8 (0.8)* | -2.4 (-4.9 to 0.1)                                                  | 0.06            |
| Ferdowsian (2010) [8] | 110.3 (1.9)        | 105.5 (1.9) | -4.7 (0.6)** | 110.2 (2.7)   | 111.0 (2.8) | 0.8 (0.6)   | -5.5 (-7.3 to -3.7)**                                               | <0.0001         |

|                |            |            |              |            |            |            |      |       |
|----------------|------------|------------|--------------|------------|------------|------------|------|-------|
| Lee (2016) [4] | 85.0 (9.8) | 81.9 (9.9) | -3.1 (4.9)** | 82.3 (7.5) | 81.5 (7.9) | -0.8 (4.6) | -2.3 | 0.027 |
|----------------|------------|------------|--------------|------------|------------|------------|------|-------|

Data are presented as mean (SD, if available) unless otherwise indicated, \* $p < 0.05$ , \*\* $p < 0.01$ , CI = Confidence Interval.

**Supplementary Table S4.** Changes in Systolic Blood Pressure levels (mmHg) by group assignment.

| Reference             | Intervention Group |              |              | Control Group |              |              | Between-Group Difference | <i>p</i> -Value |
|-----------------------|--------------------|--------------|--------------|---------------|--------------|--------------|--------------------------|-----------------|
|                       |                    |              |              |               |              |              | (Intervention-Control)   |                 |
|                       | Baseline           | Final        | Change       | Baseline      | Final        | Change       | Mean (95% CI)            |                 |
| Nicholson (1999) [1]  | 136.6 (10.0)       | 126.2 (14.9) | -10.4        | 149.5 (21.6)  | 130.6 (11.9) | -18.9        | 8.5                      |                 |
| Wheeler (2002) [6]    | 145 (4)            | 141 (3)      | -4           | 145 (3)       | 140 (4)      | -5           | 1                        | 0.90            |
| Barnard (2009) [2]    | 123.8 (2.5)        | 123.8 (2.4)  | 0.0 (2.0)    | 122.9 (2.1)   | 126.6 (2.4)  | 3.7 (1.9)    | -3.7 (-9.2 to 1.8)       | 0.19            |
| Ferdowsian (2010) [8] | 118.8 (1.7)        | 118.8 (1.7)  | 0.0 (1.4)    | 116.4 (1.6)   | 122.1 (2.5)  | 5.7 (2.2)**  | -5.7 (-10.6 to -0.9)*    | 0.03            |
| Mishra (2013) [7]     | 127 (1.6)          | 124 (1.4)    | -2.6 (1.0)*  | 127 (1.4)     | 123 (1.0)    | -3.6 (1.1)** | 0.9 (-2.1 to 4.1)        | 0.60            |
| Bunner (2015) [3]     | 139.3 (17.0)       | 127.9 (22.6) | -11.5 (22.5) | 144.4 (21.6)  | 140.1 (19.3) | -4.3 (15.0)  | -7.2 (-20.6 to 6.2)      | 0.28            |
| Lee (2016) [4]        | 125.1 (16.1)       | 126.1 (14.4) | 1.0 (14.9)   | 128.1 (19.9)  | 126.6 (16.1) | -1.5 (18.7)  | 2.5                      | 0.186           |
| Barnard (2018) [5]    | 133.4 (2.3)        | 131.8 (4.1)  | -1.6 (2.9)   | 126.8 (4.8)   | 119.7 (4.0)  | -7.1 (3.9)   | 5.5 (-5.6 to 16.5)       | 0.31            |

Data are presented as mean (SD, if available) unless otherwise indicated, \* $p < 0.05$ , \*\* $p < 0.01$ , CI = Confidence Interval.

**Supplementary Table S5.** Changes in Diastolic Blood Pressure levels (mmHg) by group assignment.

| Reference             | Intervention Group |            |              | Control Group |             |              | Between-Group Difference<br>(Intervention-Control)<br>Mean (95% CI) | <i>p</i> -Value |
|-----------------------|--------------------|------------|--------------|---------------|-------------|--------------|---------------------------------------------------------------------|-----------------|
|                       | Baseline           | Final      | Change       | Baseline      | Final       | Change       |                                                                     |                 |
| Nicholson (1999) [1]  | 84.0 (4.5)         | 78.2 (9.7) | −5.8         | 86.0 (15.8)   | 75.4 (11.6) | −10.6        | 4.8                                                                 |                 |
| Wheeler (2002) [6]    | 83 (2)             | 80 (2)     | −3*          | 82 (2)        | 78 (2)      | −4*          | 1                                                                   | 0.75            |
| Barnard (2009) [2]    | 77.9 (1.6)         | 74.0 (1.4) | −3.9 (1.3)** | 80.0 (1.5)    | 77.3 (1.5)  | −2.7 (1.1)*  | −1.2 (−4.6 to 2.2)                                                  | 0.48            |
| Ferdowsian (2010) [8] | 80.5 (1.2)         | 80.1 (1.1) | −0.4 (1.1)   | 78.4 (1.3)    | 83.5 (1.5)  | 5.1 (1.2)**  | −5.6 (−9.0 to −2.2)**                                               | 0.002           |
| Mishra (2013) [7]     | 83 (1.1)           | 79 (1.0)   | −3.5 (0.8)** | 81 (0.9)      | 79 (0.8)    | −2.6 (0.7)** | 0.9 (−2.1 to 4.1)                                                   | 0.60            |
| Bunner (2015) [3]     | 81.5 (9.7)         | 75.8 (9.0) | −5.7 (9.4)*  | 87.2 (14.5)   | 84.4 (10.4) | −2.8 (8.8)   | −2.9 (−9.2 to 3.5)                                                  | 0.36            |
| Lee (2016) [4]        | 75.6 (10.9)        | 76.7 (9.3) | 1.1 (9.0)    | 78.1 (12.1)   | 76.7 (10.3) | −1.4 (9.9)   | 2.5                                                                 | 0.335           |
| Barnard (2018) [5]    | 79.7 (3.8)         | 78.6 (3.5) | −1.2 (3.4)   | 76.6 (2.0)    | 71.9 (2.2)  | −4.7 (2.5)   | 3.5 (−5.1 to 12.1)                                                  | 0.40            |

Data are presented as mean (SD, if available) unless otherwise indicated, \* $p < 0.05$ , \*\* $p < 0.01$ , CI = Confidence Interval.

**Supplementary Table S6.** Changes in Total Cholesterol levels (mg/dL) by group assignment.

| Reference | Intervention Group |  | Control Group |  | Between-Group<br>Difference<br>(Intervention-Control) | <i>p</i> -Value |
|-----------|--------------------|--|---------------|--|-------------------------------------------------------|-----------------|
|-----------|--------------------|--|---------------|--|-------------------------------------------------------|-----------------|

|                       |               |                |               |                |                |               | Mean (95% CI)           |       |
|-----------------------|---------------|----------------|---------------|----------------|----------------|---------------|-------------------------|-------|
|                       | Baseline      | Final          | Change        | Baseline       | Final          | Change        |                         |       |
| Nicholson (1999) [1]  | 203.0 (42.08) | 178.76 (50.97) | −24.32        | 214.67 (23.55) | 190.35 (17.76) | −24.32        | 0.0                     |       |
| Wheeler (2002) [6]    | 183.4 (7.34)  | 167.57 (6.95)  | −15.83**      | 183.4 (8.88)   | 167.57 (8.49)  | −15.83**      | 0.0                     | 0.88  |
| Barnard (2009) [2]    | 187.0 (5.3)   | 165.5 (4.5)    | −21.6 (4.2)** | 198.9 (6.2)    | 184.1 (5.5)    | −14.8 (5.1)** | −6.8 (−19.9 to 6.4)     | 0.31  |
| Ferdowsian (2010) [8] | 186.8 (4.6)   | 177.1 (4.7)    | −9.8 (3.6)**  | 183.9 (5.0)    | 182.3 (5.4)    | −1.6 (3.5)    | −8.1 (−18.6 to 2.3)     | 0.13  |
| Mishra (2013) [7]     | 189 (4.3)     | 176 (4.2)      | −13.7 (3.5)** | 191 (3.5)      | 189 (3.5)      | −1.3 (2.3)    | −12.3 (−4.3 to −20.3)** | 0.001 |
| Bunner (2015) [3]     | 171.2 (48.4)  | 159.1 (42.6)   | −12.1 (37.8)  | 173.4 (41.4)   | 175.6 (34.0)   | 2.2 (25.6)    | −14.4 (−36.9 to 8.2)    | 0.20  |
| Barnard (2018) [5]    | 157.4 (7.6)   | 146.4 (7.8)    | −10.9 (6.5)   | 155.6 (6.0)    | 136.7 (7.1)    | −18.9 (3.8)** | 8.0 (−7.0 to 23.0)      | 0.28  |

Data are presented as mean (SD, if available) unless otherwise indicated, \* $p < 0.05$ , \*\* $p < 0.01$ , CI = Confidence Interval.

**Supplementary Table S7.** Changes in High Density Lipoprotein Cholesterol levels (mg/dL) by group assignment.

| Reference                       | Intervention Group |               |              | Control Group |              |            | Between-Group Difference<br>(Intervention-Control) | <i>p</i> -Value |
|---------------------------------|--------------------|---------------|--------------|---------------|--------------|------------|----------------------------------------------------|-----------------|
|                                 | Mean (95% CI)      |               |              |               |              |            |                                                    |                 |
|                                 | Baseline           | Final         | Change       | Baseline      | Final        | Change     |                                                    |                 |
| Nicholson (1999) [1]            | 44.4 (12.36)       | 36.68 (10.81) | −7.72*       | 43.24 (6.56)  | 42.47 (6.56) | −0.77      | −6.95                                              |                 |
| Wheeler [6]                     | 34.36 (2.7)        | 35.91 (2.7)   | 1.55         | 37.07 (3.47)  | 34.75 (2.7)  | −2.32      | 3.87                                               | 0.09            |
| Barnard (2009) [2]              | 52.3 (2.8)         | 51.3 (2.6)    | −1.0 (1.0)   | 49.8 (2.1)    | 48.6 (2.1)   | −1.3 (1.7) | 0.3 (−3.7 to 4.2)                                  | 0.89            |
| Ferdowsian (2010) <sup>17</sup> | 52.7 (1.6)         | 48.3 (1.6)    | −4.3 (0.8)** | 50.9 (2.1)    | 50.5 (2.3)   | −0.4 (0.9) | −3.9 (−6.4 to −1.5)**                              | 0.002           |
| Mishra (2013) [7]               | 55 (1.8)           | 51 (1.7)      | −3.3 (1.1)** | 56 (1.4)      | 56.7 (1.3)   | 0.7 (0.9)  | 3.9 (−6.6 to −1.3)**                               | 0.001           |
| Bunner (2015) [3]               | 52.1 (15.1)        | 46.8 (11.4)   | −5.2 (10.1)* | 47.4 (18.9)   | 45.0 (16.9)  | −2.4 (6.9) | −2.9 (−8.9 to 3.2)                                 | 0.34            |
| Lee (2016) [4]                  | 50.0 (12.3)        | 52.2 (14.9)   | 2.2 (8.8)    | 51.2 (13.3)   | 51.7 (13.0)  | 0.5 (8.2)  | 1.7                                                | 0.459           |
| Barnard (2018) [5]              | 54.6 (4.6)         | 51.2 (4.8)    | −3.4 (1.6)*  | 57.7 (3.8)    | 56.6 (3.9)   | −1.1 (1.5) | −2.4 (−6.8 to 2.1)                                 | 0.29            |

Data are presented as mean (SD, if available) unless otherwise indicated, \* $p < 0.05$ , \*\* $p < 0.01$ , CI = Confidence Interval.

**Supplementary Table S8.** Changes in Low Density Lipoprotein Cholesterol levels (mg/dL) by group assignment.

| Reference             | Intervention Group |             |               | Control Group |              |               | Between-Group Difference<br>(Intervention-Control) | <i>p</i> -Value |
|-----------------------|--------------------|-------------|---------------|---------------|--------------|---------------|----------------------------------------------------|-----------------|
|                       |                    |             |               |               |              |               | Mean (95% CI)                                      |                 |
|                       | Baseline           | Final       | Change        | Baseline      | Final        | Change        |                                                    |                 |
| Barnard (2009) [2]    | 104.4 (4.7)        | 90.9 (4.4)  | −13.5 (4.3)** | 117.7 (5.9)   | 108.3 (5.4)  | −9.4 (4.5)*   | −4.1 (−16.4 to 8.2)                                | 0.51            |
| Ferdowsian (2010) [8] | 103.5 (3.9)        | 99.1 (4.0)  | −4.4 (3.3)    | 106.7 (4.1)   | 105.3 (4.6)  | −1.4 (3.2)    | −3.0 (−12.5 to 6.4)                                | 0.53            |
| Mishra (2013) [7]     | 109 (3.7)          | 96 (3.4)    | −13.0 (2.8)** | 110 (3.2)     | 108 (3.0)    | −1.7 (1.9)    | −11.3 (−17.8 to −4.8)**                            | <0.001          |
| Bunner (2015) [3]     | 89.0 (38.3)        | 81.2 (34.2) | −7.8 (28.9)   | 95.4 (43.6)   | 95.8 (34.5)  | 0.4 (21.0)    | −8.2 (−25.8 to 9.5)                                | 0.35            |
| Lee (2016) [4]        | 92.7 (28.5)        | 89.8 (32.3) | −2.8 (17.8)   | 102.8 (39.0)  | 101.9 (38.5) | −1.0 (29.3)   | −1.8                                               | 0.732           |
| Barnard (2018) [5]    | 75.6 (8.1)         | 63.7 (7.7)  | −11.9 (3.9)** | 74.8 (4.9)    | 62.1 (4.6)   | −12.7 (3.6)** | 0.8 (−10.1 to 11.6)                                | 0.89            |

Data are presented as mean (SD, if available) unless otherwise indicated, \* $p < 0.05$ , \*\* $p < 0.01$ , CI = Confidence Interval.

**Supplementary Table S9.** Changes in Triglycerides levels (mg/dL) by group assignment.

| Reference                               | Intervention Group |                |               | Control Group   |                 |               | Between-Group Difference<br>(Intervention-Control)<br>Mean (95% CI) | p-Value |
|-----------------------------------------|--------------------|----------------|---------------|-----------------|-----------------|---------------|---------------------------------------------------------------------|---------|
|                                         | Baseline           | Final          | Change        | Baseline        | Final           | Change        |                                                                     |         |
| Nicholson (1999) [1]                    | 187.61 (69.03)     | 165.49 (55.75) | -22.12        | 202.65 (169.91) | 163.72 (100.88) | -38.93        | 16.81                                                               |         |
| Barnard (2009) [2]                      | 148.1 (16.1)       | 114.2 (9.7)    | -33.9 (12.7)* | 158.1 (18.8)    | 150.3 (28.8)    | -7.8 (28.9)   | -26.1 (-89.2 to 37.0)                                               | 0.41    |
| Ferdowsian (2010) [8]                   | 154.2 (11.8)       | 149.8 (10.9)   | -4.4 (6.5)    | 131.6 (9.2)     | 135.2 (13.1)    | 3.5 (10.1)    | -7.9 (-30.5 to 14.7)                                                | 0.49    |
| Mishra (2013) [7]                       | 129 (7.0)          | 143 (7.1)      | 13.9 (5.6)*   | 127 (6.28)      | 124 (5.9)       | -2.9 (4.3)    | 16.8 (3.1 to 30.6)*                                                 | 0.03    |
| Bunner (2015) [3]                       | 151(66.3)          | 155.7 (61.6)   | 4.7 (56.2)    | 152.6 (88.8)    | 174.5 (110.6)   | 21.9 (68.9)   | -17.2 (-61.2 to 26.8)                                               | 0.43    |
| Lee (2016) [4]                          | 130.3 (61.7)       | 143.7 (92.4)   | 13.4 (72.8)   | 147.7 (113.8)   | 128.8 (57.9)    | -18.9 (81.9)  | 32.3                                                                | 0.053   |
| Barnard (2018) [5]                      | 155.9 (25.9)       | 176.7 (31.1)   | 20.8 (21.4)   | 115.6 (10.8)    | 90.7 (8.7)      | -24.9 (7.1)** | 45.7 (-2.1 to 93.6)                                                 | 0.06    |
| Wheeler (2002) [6]<br>12.5h AUC (mg%.h) | 3 147 (494)        | 2 839 (463)    | -308          | 3 091 (531)     | 2 727 (440)     | -364          | 56                                                                  | 0.99    |

Data are presented as mean (SD, if available) unless otherwise indicated, \* $p < 0.05$ , \*\* $p < 0.01$ , CI = Confidence Interval.

**Supplementary Table S10.** Changes in Urinary Albumin/24 h (mg/24 h) by group assignment.

| Reference                                                               | Intervention Group |               |             | Control Group |             |             | Between-Group Difference<br>(Intervention-Control)<br>Mean (95 % CI) | p-Value |
|-------------------------------------------------------------------------|--------------------|---------------|-------------|---------------|-------------|-------------|----------------------------------------------------------------------|---------|
|                                                                         | Baseline           | Final         | Change      | Baseline      | Final       | Change      |                                                                      |         |
| Nicholson (1999) [1]                                                    | 434.8 (565.5)      | 155.2 (182.6) | -279.6      | 82.9 (114.6)  | 169.2 (298) | 86.3        | -365.9                                                               |         |
| Barnard (2009) [2]                                                      | 33.0 (7.4)         | 20.2 (4.6)    | -12.8 (7.0) | 55.0 (37.2)   | 69.5 (47.2) | 14.6 (12.0) | -27.4 (-55.1 to 0.3)                                                 | 0.05    |
| Barnard (2018) [5]<br>median (mg/dL)                                    | 0.7                | 0.8           | 0.2**       | 0.6           | 0.6         | -0.05       | 0.75 (0.1 to 9.8)*                                                   | 0.027   |
| Wheeler (2002) [6]<br>RPF (ml.min <sup>-1</sup> .1,73 m <sup>-2</sup> ) | 276 (25)           | 298 (30)      | 22          | 361 (43)      | 312 (28)    | -49         | 71                                                                   | 0.21    |
| Wheeler (2002) [6]<br>GFR (ml.min <sup>-1</sup> .1,73 m <sup>-2</sup> ) | 100 (7)            | 108 (8)       | 8           | 116 (9)       | 118 (6)     | 2           | 6                                                                    | 0.63    |
| Wheeler (2002) [6]<br>AER (µg/min)                                      | 68 (39)            | 49 (26)       | -19         | 53 (29)       | 62 (28)     | 9           | 28                                                                   | 0.11    |

Data are presented as mean (SD, if available) unless otherwise indicated, \* $p < 0.05$ , \*\* $p < 0.01$ , CI = Confidence Interval.

## References

1. Nicholson, A.S.; Sklar, M.; Barnard, N.D.; Gore, S.; Sullivan, R.; Browning, S. Toward Improved Management of NIDDM: A Randomized, Controlled, Pilot Intervention Using a Lowfat, Vegetarian Diet. *Prev. Med.* **1999**, *29*, 87–91, doi:10.1006/pmed.1999.0529.
2. Barnard, N.D.; Cohen, J.; A Jenkins, D.J.; Turner-McGrievy, G.; Gloede, L.; Green, A.; Ferdowsian, H. A low-fat vegan diet and a conventional diabetes diet in the treatment of type 2 diabetes: a randomized, controlled, 74-wk clinical trial. *Am. J. Clin. Nutr.* **2009**, *89*, 1588S–1596S, doi:10.3945/ajcn.2009.26736h.
3. Bunner, A.; Wells, C.L.; Gonzales, J.C.; Agarwal, U.; Bayat, E.; Barnard, N.D. A dietary intervention for chronic diabetic neuropathy pain: a randomized controlled pilot study. *Nutr. Diabetes* **2015**, *5*, e158, doi:10.1038/nutd.2015.8.
4. Lee, Y.-M.; Kim, S.-A.; Lee, I.-K.; Kim, J.-G.; Park, K.-G.; Jeong, J.-Y.; Jeon, J.-H.; Shin, J.-Y.; Lee, D.-H. Effect of a Brown Rice Based Vegan Diet and Conventional Diabetic Diet on Glycemic Control of Patients with Type 2 Diabetes: A 12-Week Randomized Clinical Trial. *PLOS ONE* **2016**, *11*, e0155918, doi:10.1371/journal.pone.0155918.
5. Barnard, N.D.; Levin, S.M.; Gloede, L.; Flores, R. Turning the Waiting Room into a Classroom: Weekly Classes Using a Vegan or a Portion-Controlled Eating Plan Improve Diabetes Control in a Randomized Translational Study. *J. Acad. Nutr. Diet.* **2018**, *118*, 1072–1079, doi:10.1016/j.jand.2017.11.017.
6. Wheeler, M.L.; Fineberg, S.E.; Fineberg, N.S.; Gibson, R.G.; Hackward, L.L. Animal versus plant protein meals in individuals with type 2 diabetes and microalbuminuria: effects on renal, glycemic, and lipid parameters. *Diabetes Care* **2002**, *25*, 1277–1282, doi:10.2337/diacare.25.8.1277.
7. Mishra, S.; Xu, J.; Agarwal, U.; Gonzales, J.R.; A Levin, S.; Barnard, N.D. A multicenter randomized controlled trial of a plant-based nutrition program to reduce body weight and cardiovascular risk in the corporate setting: the GEICO study. *Eur. J. Clin. Nutr.* **2013**, *67*, 718–724, doi:10.1038/ejcn.2013.92.
8. Ferdowsian, H.R.; Barnard, N.D.; Hoover, V.J.; Katcher, H.I.; Levin, S.M.; Green, A.A.; Cohen, J.L. A Multicomponent Intervention Reduces Body Weight and Cardiovascular Risk at a GEICO Corporate Site. *Am. J. Heal. Promot.* **2010**, *24*, 384–387, doi:10.4278/ajhp.081027-quan-255.
